# Supplementary material for: Comparative and Phylogenetic Analyses of Complete Chloroplast Genomes of Scrophularia incisa Complex (Scrophulariaceae)
Source: MDPI journal article supplement (doi:10.3390/genes13101691), 2022-09-21
Supplement: s1 [file s1]

Table S1. The list of 26 chloroplast genomes from Scrophulariaceae in phylogenetic analyses.

| Genus               | Taxon                   | Individual code | GenBank<br>Accession | Specimen<br>Number |
|---------------------|-------------------------|-----------------|----------------------|--------------------|
| <i>Scrophularia</i> | <i>S. kiriloviana</i>   | Xinjiang AH18   | OP018676             | WRH130602          |
|                     | <i>S. kiriloviana</i>   | Xinjiang AK1    | OP036427             | WRH130606          |
|                     | <i>S. kiriloviana</i>   | Xinjiang ZS3    | OP036428             | FU13865            |
|                     | <i>S. incisa</i>        | Gansu DJ1       | OP036429             | FU12901            |
|                     | <i>S. inicsa</i>        | Qinghai XH7     | OP018675             | LP1108049          |
|                     | <i>S. dentata</i>       | Xizang ZG4      | OP018677             | LP150743           |
|                     | <i>S. dentata</i>       |                 | MF861202             |                    |
|                     | <i>S. integrifolia</i>  | Tajikistan H8   | OP018678             | LP173722           |
|                     | <i>S. buergeriana</i>   |                 | KP718626             |                    |
|                     | <i>S. takesimensis</i>  |                 | KP718628             |                    |
|                     | <i>S. henryi</i>        |                 | MF861203             |                    |
|                     | <i>S. ningpoensis</i>   |                 | MN734369             |                    |
|                     | <i>S. cephalantha</i>   |                 | MN255822             |                    |
| <i>Verbascum</i>    | <i>V. phoeniceum</i>    |                 | MN893301             |                    |
|                     | <i>V. chinense</i>      |                 | MT610040             |                    |
| <i>Buddleja</i>     | <i>B. alternifolia</i>  |                 | MN395662             |                    |
|                     | <i>B. officinalis</i>   |                 | MZ955034             |                    |
|                     | <i>B. lindleyana</i>    |                 | MW556315             |                    |
|                     | <i>B. sessilisfolia</i> |                 | MH411149             |                    |
|                     | <i>B. colvilei</i>      |                 | NC042766             |                    |
| <i>Myoporum</i>     | <i>M. bontioides</i>    |                 | MW348925             |                    |
|                     | <i>M. bontioides</i>    |                 | NC050956             |                    |
|                     | <i>M. laetum</i>        |                 | MN044641             |                    |
| <i>Diocirea</i>     | <i>D. violacea</i>      |                 | MN044644             |                    |
| <i>Eremophila</i>   | <i>E. oppositifolia</i> |                 | MN044645             |                    |
| <i>Leucophyllum</i> | <i>L. frutescens</i>    |                 | MN044638             |                    |
